# Supplementary material for: Bacillus cereus–Attributable Primary Cutaneous Anthrax-Like Infection in Newborn Infants, India
Source: PubMed Central journal article supplement (PMC6590766; doi:10.3201/eid2507.181493), 2019-07
Supplement: 18-1493-Techapp-s1.pdf [file 18-1493-Techapp-s1.pdf]

# *Bacillus cereus*–Attributable Primary Cutaneous Anthrax-Like Infection in Newborn Infants, India

## Appendix

**Appendix Table.** Primer sequences used in this study\*

| Target gene   | Sequence (5'–3')                                          | Amplicon size, bp | Annealing temperature, °C | Reference/GenBank accession no. |
|---------------|-----------------------------------------------------------|-------------------|---------------------------|---------------------------------|
| <i>cytK</i>   | F: CAACCCAGTTTGCAGTTCCG<br>R: GGCGCTAGTGCAACATTACG        | 601               | 55                        | AJ277962                        |
| <i>nheA</i>   | F: GTTAGGATCACAATCACCGC<br>R: ACGAATGTAATTTGAGTCGC        | 755               | 48                        | (1)                             |
| <i>nheB</i>   | F: TTTAGTAGTGGATCTGTACGC<br>R: TTAATGTTTCGTTAATCCTGC      | 743               | 45                        | (1)                             |
| <i>nheC</i>   | F: TGGATTCCAAGATGTAACG<br>R: ATTACGACTTCTGCTTGTGC         | 683               | 47                        | (1)                             |
| <i>entFM</i>  | F: AAAGAAATTAATGGACAAACTCAA<br>R: GTATGTAGCTGGGCCTGTACGT  | 596               | 50                        | (2)                             |
| <i>hblC</i>   | F: GATACTCAATGTGGCAACTGC<br>R: TTGAGACTGCTCGTCTAGTTG      | 740               | 52                        | (3)                             |
| <i>hblD</i>   | F: ACCGGTAACACTATTCATGC<br>R: GAGTCCATATGCTTAGATGC        | 829               | 48                        | (1)                             |
| <i>hblA</i>   | F: AAGCAATGGAATACAATGGG<br>R: AGAATCTAAATCATGCCACTGC      | 1154              | 48                        | (1)                             |
| <i>sph</i>    | F: CGTGCCGATTTAATTGGGGC<br>R: CAATGTTTTAAACATGGATGCG      | 558               | 48                        | (4)                             |
| <i>pi-plc</i> | F: CGCTATCAAATGGACCATGG<br>R: GGACTATTCCATGCTGTACC        | 569               | 51                        | (5)                             |
| <i>cya</i>    | F: GCGTTTTCTTTAGCGTTTTTC<br>R: CTACATTTTAGCCATCACTTCT     | 727               | 48                        | (6)                             |
| <i>cap</i>    | F: CTGAGCCATTAATCGATATG<br>R: TCCCCTTACGTAATCTGAG         | 846               | 55                        | (7)                             |
| <i>pag</i>    | F: TCCTAACACTAACGAAGTCG<br>R: GAGGTAGAAGGATATACGGT        | 596               | 55                        | (8)                             |
| <i>lef</i>    | F: TGAACCCGTAATTGTAATCCAATC<br>R: ATCGCTCCAGTGTTGATAGTGCT | 475               | 53                        | (9)                             |

\*F, forward; R, reverse.

## References

1. Guinebretière MH, Broussolle V, Nguyen-The C. Enterotoxigenic profiles of food-poisoning and food-borne *Bacillus cereus* strains. J Clin Microbiol. 2002;40:3053–6. [PubMed](https://pubmed.ncbi.nlm.nih.gov/12011288/) <http://dx.doi.org/10.1128/JCM.40.8.3053-3056.2002>
2. Kim J-B, Kim J-M, Cho S-H, Oh H-S, Choi NJ, Oh D-H. Toxin genes profiles and toxin production ability of *Bacillus cereus* isolated from clinical and food samples. J Food Sci. 2011;76:T25–9. [PubMed](https://pubmed.ncbi.nlm.nih.gov/21111211/) <http://dx.doi.org/10.1111/j.1750-3841.2010.01958.x>

3. Chon JW, Kim JH, Lee SJ, Hyeon JY, Song KY, Park C, et al. Prevalence, phenotypic traits and molecular characterization of emetic toxin-producing *Bacillus cereus* strains isolated from human stools in Korea. J Appl Microbiol. 2012;112:1042–9. PubMed <http://dx.doi.org/10.1111/j.1365-2672.2012.05277.x>
4. Hsieh YM, Sheu SJ, Chen YL, Tsen HY. Enterotoxigenic profiles and polymerase chain reaction detection of *Bacillus cereus* group cells and *B. cereus* strains from foods and food-borne outbreaks. J Appl Microbiol. 1999;87:481–90. PubMed <http://dx.doi.org/10.1046/j.1365-2672.1999.00837.x>
5. Hansen BM, Damgaard PH, Eilenberg J, Pedersen JC. Molecular and phenotypic characterization of *Bacillus thuringiensis* isolated from leaves and insects. J Invertebr Pathol. 1998;71:106–14. PubMed <http://dx.doi.org/10.1006/jipa.1997.4712>
6. Shangkuan YH, Chang YH, Yang JF, Lin HC, Shaio MF. Molecular characterization of *Bacillus anthracis* using multiplex PCR, ERIC-PCR and RAPD. Lett Appl Microbiol. 2001;32:139–45. PubMed <http://dx.doi.org/10.1046/j.1472-765x.2001.00881.x>
7. Hutson RA, Duggleby CJ, Lowe JR, Manchee RJ, Turnbull PC. The development and assessment of DNA and oligonucleotide probes for the specific detection of *Bacillus anthracis*. J Appl Bacteriol. 1993;75:463–72. PubMed <http://dx.doi.org/10.1111/j.1365-2672.1993.tb02803.x>
8. Beyer W, Glöckner P, Otto J, Böhm R. A nested PCR method for the detection of *Bacillus anthracis* in environmental samples collected from former tannery sites. Microbiol Res. 1995;150:179–86. PubMed [http://dx.doi.org/10.1016/S0944-5013\(11\)80054-6](http://dx.doi.org/10.1016/S0944-5013(11)80054-6)
9. Kim K, Seo J, Wheeler K, Park C, Kim D, Park S, et al. Rapid genotypic detection of *Bacillus anthracis* and the *Bacillus cereus* group by multiplex real-time PCR melting curve analysis. FEMS Immunol Med Microbiol. 2005;43:301–10. PubMed <http://dx.doi.org/10.1016/j.femsim.2004.10.005>
